# Supplementary material
Source: PubMed Central journal article supplement (PMC2652267)
Supplement: M807968200_1.pdf [file M807968200_1.pdf]

Supplemental Figure 1

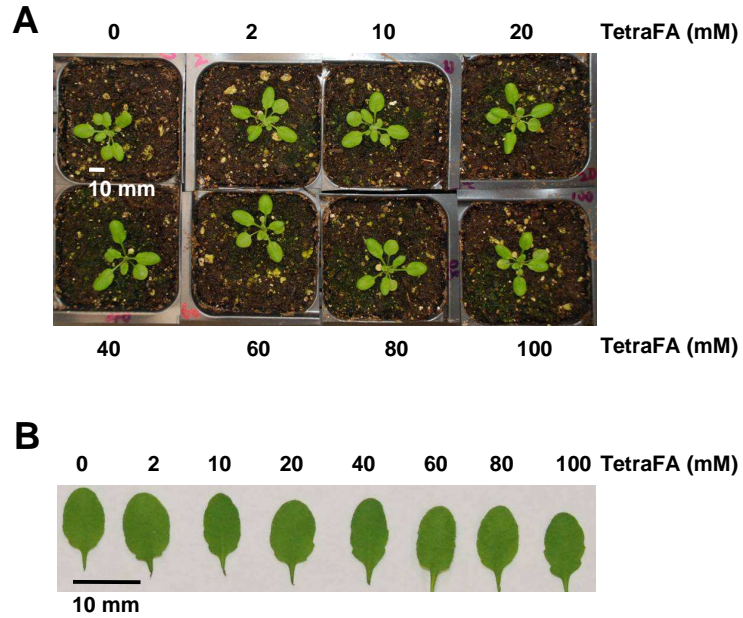

Figure S1. Application of tetraFA from 2 mM - 100 mM to *Arabidopsis* leaves did not have detectable toxic effect. *A* and *B*. Photographs of tetraFA-treated *Arabidopsis* (*A*) and representative distal leaves (*B*) at 6 dpi. After 1° infection with avirulent *Psm* AvrRpt2, 10 mM HEPES buffer (pH 7.0) with 0 mM, 2 mM, 10 mM, 20 mM, 60 mM, 80 mM and 100 mM tetraFA was applied to distal leaves by repeated spraying at 3, 24 and 48 hpi.
